# Supplementary material
Source: PubMed Central journal article supplement (PMC6868607)
Supplement: ao9b01462_si_001.pdf [file ao9b01462_si_001.pdf]

## Supporting Information

Article title: **Tomato's green gold: Bioeconomy potential of residual tomato leaf biomass as a novel source for the secondary metabolite rutin**

Laura V. Junker-Frohn\*<sup>1,6</sup>, Manuel Lück<sup>2,6</sup>, Simone Schmittgen<sup>3,6</sup>, Joana Wensing<sup>4,6</sup>, Laura Carraresi<sup>4,6</sup>, Björn Thiele<sup>1,6</sup>, Tanja Groher<sup>3,6,a</sup>, Julia J. Reimer<sup>5,6</sup>, Stefanie Bröring<sup>4,6</sup>, Georg Noga<sup>3,6</sup>, Andreas Jupke<sup>2,6</sup>, Ulrich Schurr<sup>1,6</sup>, Björn Usadel<sup>1,5</sup>, Anika Wiese-Klinkenberg<sup>1,6</sup>, Alexandra Wormit<sup>5,6</sup>

<sup>1</sup> Institute of Bio and Geosciences, Plant Sciences (IBG-2), Forschungszentrum Jülich GmbH, Jülich, Germany.

<sup>2</sup> Chair of Fluid Process Engineering (AVT.FVT), RWTH Aachen University, Aachen, Germany.

<sup>3</sup> Institute of Plant Sciences and Resource Conservation (INRES), Horticultural Sciences, University of Bonn, Bonn, Germany.

<sup>4</sup> Institute for Food and Resource Economics (ILR), Chair for Technology and Innovation Management in Agribusiness, University of Bonn, Bonn, Germany.

<sup>5</sup> Institute for Biology I - Botany, RWTH Aachen University, Aachen, Germany.

<sup>6</sup> Bioeconomy Science Center, c/o Forschungszentrum Jülich, 52425 Jülich, Germany.

The following Supporting Information is available for this article:

---

<sup>a</sup> Current address: Agroscope, Taenikon 1, 8356 Ettenhausen, Switzerland

Figure S1:

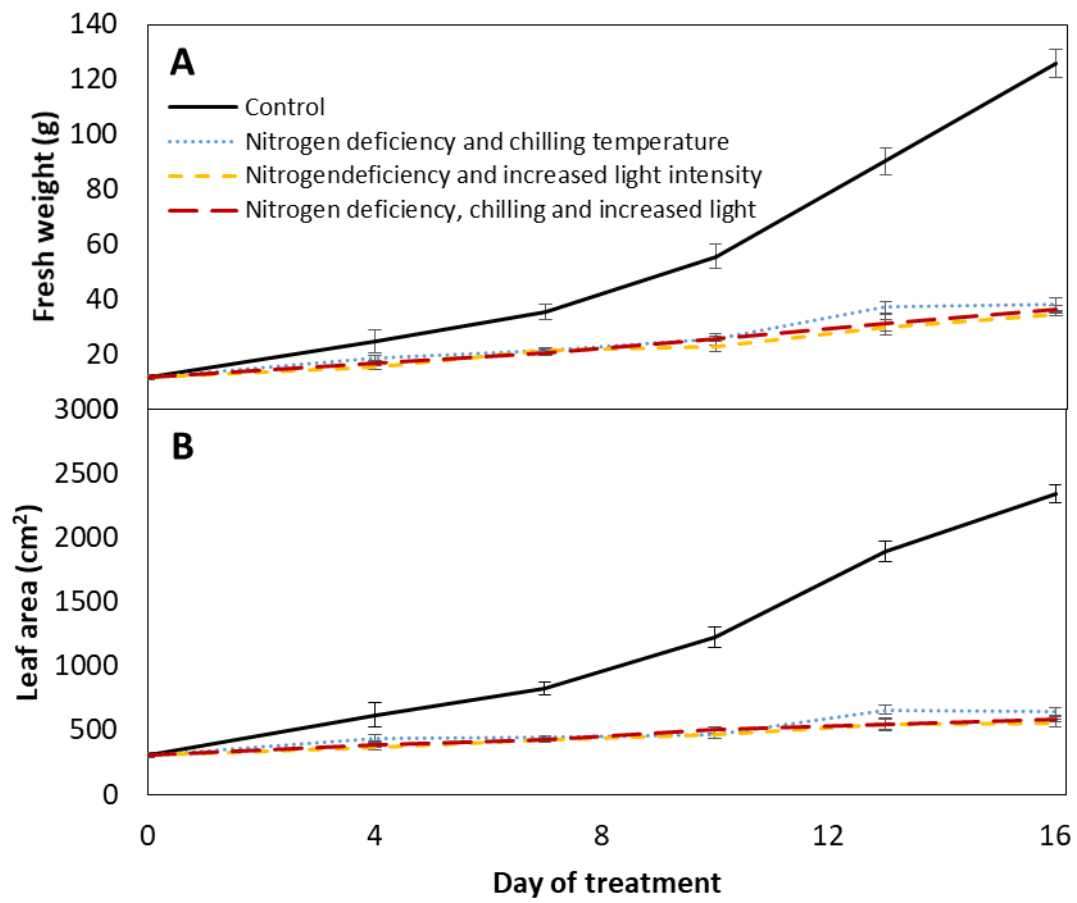

Figure S1: Effect of stress treatments on young tomato plants over 16 days of nitrogen deficiency in combination with increased light intensities and/or chilling temperatures compared to control plants. a) Plant biomass as fresh weight (g). b) Total leaf area (cm<sup>2</sup>). Data represent mean of N=4 plants ( $\pm$ SD).
